# Supplementary material
Source: PubMed Central journal article supplement (PMC8697481)
Supplement: aim-olf-L210424-L21-0424_Supplement.pdf [file aim-olf-L210424-L21-0424_Supplement.pdf]

## Supplementary Material\*

Muti-Schüenemann GEU, Szczeklik W, Solo K, et al. Update alert 3: ventilation techniques and risk for transmission of coronavirus disease, including COVID-19. *Ann Intern Med.* 14 December 2021. [Epub ahead of print]. doi:10.7326/L21-0424

| <b>Item</b>                                                                                                                                                                                                                            | <b>Page</b> |
|----------------------------------------------------------------------------------------------------------------------------------------------------------------------------------------------------------------------------------------|-------------|
| <i>Supplement Figure 1.</i> PRISMA diagram for living systematic reviews                                                                                                                                                               | 2           |
| <i>Supplement Table 1.</i> Characteristics of included studies comparing different modalities of invasive and non-invasive ventilation                                                                                                 | 3           |
| <i>Supplement Table 2.</i> Results of randomized, adjusted and unadjusted studies of COVID-19 patients comparing no ventilation, invasive mechanical ventilation and non-invasive mechanical ventilation by hard outcome and subgroups | 11          |
| <i>Supplement Table 3.</i> Evidence Profile Non-invasive ventilation compared to invasive mechanical ventilation for COVID-19 and acute hypoxemic respiratory failure                                                                  | 18          |
| <i>Supplement Table 4.</i> Evidence Profile non-invasive ventilation compared to oxygen only for COVID-19 and acute hypoxemic respiratory failure                                                                                      | 19          |
| <i>Supplement Figure 2.</i> Forest plot showing adjusted HRs of NIV (vs IMV) for mortality (4 studies included; Grasselli 2020 and Potalivo 2020 are the newly added studies).                                                         | 20          |
| <i>Supplement Figure 3.</i> Forest plot showing adjusted HRs of NIV (vs no MV) for mortality (2 studies included; Grasselli 2020 and Potalivo 2020 are the newly added studies).                                                       | 21          |
| References                                                                                                                                                                                                                             | 22          |

\* This supplementary material was provided by the authors to give readers further details on their article. The material was reviewed but not copyedited.

Figure 1. Prisma diagram for living systematic reviews

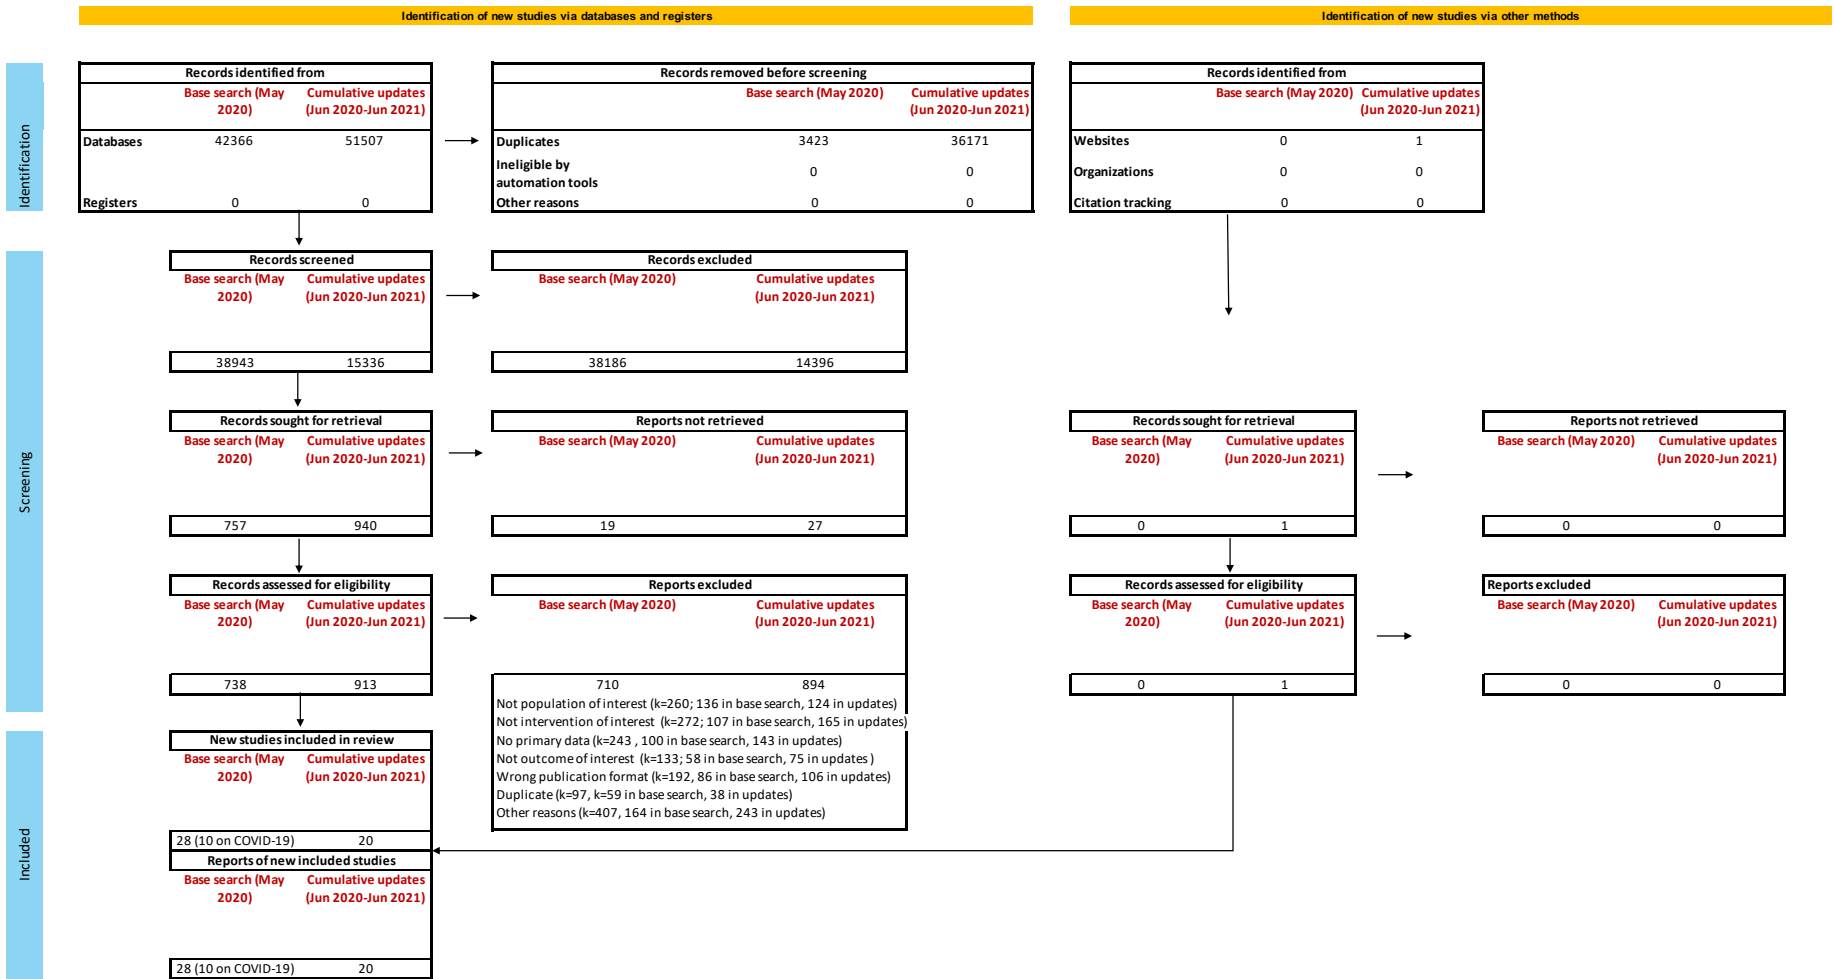

Supplement Table 1. Characteristics of included studies comparing different modalities of invasive and non-invasive ventilation

| Study, analyzed design, Number of patients, Virus (preprint if indicated) | Ventilation          | Age (mean & SD or median & IQR/range)             | Eligibility criteria if reported                                                                           | Degree of hypoxia based on PaO <sub>2</sub> /FiO <sub>2</sub> ratio                                                    | Comorbidities                                                                                                                  | Radiographic pattern/findings                         | Risk of bias*                                                                                                    |
|---------------------------------------------------------------------------|----------------------|---------------------------------------------------|------------------------------------------------------------------------------------------------------------|------------------------------------------------------------------------------------------------------------------------|--------------------------------------------------------------------------------------------------------------------------------|-------------------------------------------------------|------------------------------------------------------------------------------------------------------------------|
| Duan 2020 (1), Cohort (n= 36), China, COVID-19#                           | NIV (CPAP or PEEP)   | Mean ±SD<br>50 ±14                                | All the patients who used HFNC or NIV as first-line therapy.                                               | PaO <sub>2</sub> /FiO <sub>2</sub> , mmHg<br>165 ±48                                                                   | Hypertension (23%)                                                                                                             | Not reported                                          | 8/9<br>No major concern                                                                                          |
|                                                                           | HFNC                 | Mean ±SD<br>65 ±1                                 | All the patients who used HFNC or NIV as first-line therapy.                                               | PaO <sub>2</sub> /FiO <sub>2</sub> , mmHg<br>196 ±46                                                                   | Hypertension (26%), diabetes (17%), chronic heart disease (27%), and chronic respiratory disease (4%)                          | Not reported                                          |                                                                                                                  |
| Franco 2020 (2), Cohort (n= 670), Italy, COVID-19#                        | HFNC                 | Mean ±SD<br>65.7 ±14.7                            | Not reported                                                                                               | PaO <sub>2</sub> /FiO <sub>2</sub> , mmHg<br>166 ±65                                                                   | Hypertension (47%), diabetes (20%), chronic cardiovascular disease (18%), obesity (21%), COPD (6%), CKD (8%), and cancer (11%) | Not reported                                          | 7/9<br>related to selection and comparability                                                                    |
|                                                                           | CPAP                 | Mean ±SD<br>70.3 ±12.1                            | Not reported                                                                                               | PaO <sub>2</sub> /FiO <sub>2</sub> , mmHg<br>151 ±90                                                                   | Hypertension (55%), diabetes (20%), chronic cardiovascular disease (20%), obesity (11%), COPD (4%), CKD (6%), and cancer (10%) | Not reported                                          |                                                                                                                  |
|                                                                           | NIV                  | Mean ±SD<br>66.8 ±13.5                            | Not reported                                                                                               | PaO <sub>2</sub> /FiO <sub>2</sub> , mmHg<br>138 ±66                                                                   | Hypertension (49%), diabetes (19%), chronic cardiovascular disease (13%), obesity (25%), COPD (15%), CKD (5%), and cancer (8%) | Not reported                                          |                                                                                                                  |
| Grasselli 2020 (3), Cohort (n= 3988), Italy, COVID-19#                    | NIV vs IMV vs Oxygen | Median (IQR)<br>6 (56 – 69) for the entire cohort | Not reported                                                                                               | Overall PaO <sub>2</sub> , mmHG (not disaggregated by intervention): <76 (18%); 76-93 (18%); 94-127 (18%); >127 (18%). | Hypertension (41%), diabetes (13%), heart disease (13%), obesity (25%), COPD (2%), CKD (2%), and cancer (8%)                   | Not reported                                          | 6/9<br>Related to comparability and outcome assessment                                                           |
| Grieco 2021 (4), RCT (n= 110), Italy, COVID-19#                           | NIV (helmet)         | Median (IQR)<br>66 (57 – 72)                      | PaO <sub>2</sub> /FIO <sub>2</sub> ≤200, PaCO <sub>2</sub> ≤45 mm Hg, no of history of chronic respiratory | PaO <sub>2</sub> /FIO <sub>2</sub> ratio 105 (83-125); PaO <sub>2</sub> /FIO <sub>2</sub> ratio ≤100 26 (48)           | Hypertension (44%), diabetes (24%), smoking (9%), History of cancer (8%), Immunocompromised state (6%)                         | Bilateral infiltrates on enrollment chest x-ray: 100% | High risk of bias (death, need for invasive ventilation); some concerns (length of hospital stay, length of ICU) |

|                                                           |                                            |                                                      |                                                                                                                                                                          |                                                               |                                                                                                                                                                                                     |                                                                            |                                                                                                             |
|-----------------------------------------------------------|--------------------------------------------|------------------------------------------------------|--------------------------------------------------------------------------------------------------------------------------------------------------------------------------|---------------------------------------------------------------|-----------------------------------------------------------------------------------------------------------------------------------------------------------------------------------------------------|----------------------------------------------------------------------------|-------------------------------------------------------------------------------------------------------------|
|                                                           |                                            |                                                      | failure or moderate to severe cardiac insufficiency, confirmed molecular diagnosis of COVID-19                                                                           |                                                               |                                                                                                                                                                                                     |                                                                            | stay) related to randomization process, deviation from intended intervention, and missing outcome           |
|                                                           | HFNC                                       | Median (IQR)<br>63 (55 – 69)                         | PaO2/FiO2 ≤200, PaCO2 ≤45 mm Hg, no history of chronic respiratory<br><br>failure or moderate to severe cardiac insufficiency, confirmed molecular diagnosis of COVID-19 | PaO2/FiO2 ratio 102 (80-124);<br>PaO2/FiO2 ratio ≤100 27 (49) | Hypertension (60%), diabetes (18%), smoking (20%), neurologic conditions (4%), Immunocompromised state (9%)                                                                                         | Bilateral infiltrates on enrollment chest x-ray: 100%                      |                                                                                                             |
| Gundem 2020 (5), Cohort (n= 26), Norway, COVID-19#        | Oxygen                                     | Median (IQR)<br>52 (25 – 76)                         | Not reported                                                                                                                                                             | PaO2/FiO2, mmHg<br>32 (10 – 56)                               | Not reported                                                                                                                                                                                        | Not reported                                                               | 6/9 (for mortality); 5/9 (for other outcomes) related to selection and comparability and outcome assessment |
|                                                           | NIV                                        | Median (IQR)<br>70 (55 – 78)                         | Not reported                                                                                                                                                             | PaO2/FiO2, mmHg<br>35 (21 – 42)                               | Not reported                                                                                                                                                                                        | Not reported                                                               |                                                                                                             |
|                                                           | IMV                                        | Median (IQR)<br>58 (43 – 74)                         | Not reported                                                                                                                                                             | PaO2/FiO2, mmHg<br>21 (6 – 43)                                | Not reported                                                                                                                                                                                        | Not reported                                                               |                                                                                                             |
| Kanthimathinathan 2020 (6), Cohort (n= 45), UK, COVID-19# | Supplemental Oxygen vs HFNC or CPAP vs IMV | Median (IQR)<br>3.5 (0.7 – 12) for the entire cohort | Not reported                                                                                                                                                             | Not reported                                                  | Three children (2 infants), 2 with comorbidities, required HFNC or CPAP. One infant, with preexisting congenital heart disease,<br><br>required PICU admission for invasive mechanical ventilation. | Not reported                                                               | 5/9<br><br>related to selection, comparability, and outcome assessment                                      |
| Khalil 2020 (7), Cohort (n= 220), UK, COVID-19#           | CPAP vs IMV                                | Mean ±SD                                             | Not reported                                                                                                                                                             | Median (IQR)                                                  | Comorbidities presented overall, not per arm: asthma (11%), COPD (9%) hypertension (45%), diabetes (28%),                                                                                           | Imaging localised consolidation (19 %) and bilateral consolidation (57%) , | 7/9<br><br>Related to comparability and                                                                     |

|                                                           |            |                                |                                                                          |                                                                      |                                                                                                                                                  |                                        |                                                                                                           |
|-----------------------------------------------------------|------------|--------------------------------|--------------------------------------------------------------------------|----------------------------------------------------------------------|--------------------------------------------------------------------------------------------------------------------------------------------------|----------------------------------------|-----------------------------------------------------------------------------------------------------------|
|                                                           |            | 66.9 ±17 for the entire cohort |                                                                          | PaO <sub>2</sub> /FiO <sub>2</sub> ratio, mmHg: 240.1 (144.5 –306.7) | cardiovascular disease (11%), malignancy (13%), CKD (7%) and liver disease (3%)                                                                  | and normal (11%) for the entire cohort | outcome assessment                                                                                        |
| Mukhtar 2020 (8), Cohort (n= 55), South Africa, COVID-19# | Oxygen     | Mean ±SD<br>51 ±9              | Not reported                                                             | PaO <sub>2</sub> /FiO <sub>2</sub> (median, IQR): 250 (180 – 298)    | Chronic cardiac disease (12%), Chronic pulmonary disease (0%), Chronic diabetes (50%), Chronic hypertension (62%), obesity (25%), smoking (18%)  | Not reported                           | 6/9<br>Related to selection and outcome assessment                                                        |
|                                                           | NIV        | Mean ±SD<br>59 ±14             | Not reported                                                             | PaO <sub>2</sub> /FiO <sub>2</sub> (median, IQR): 170 (112 – 224)    | Chronic cardiac disease (13%), Chronic pulmonary disease (3%), Chronic diabetes (43%), Chronic hypertension (53%), obesity (26%), smoking (3%)   | Not reported                           |                                                                                                           |
|                                                           | IMV        | Mean ±SD<br>65 ±14             | Patients who developed any feature of NIV failure was qualified for IMV. | PaO <sub>2</sub> /FiO <sub>2</sub> (median, IQR): 175 (118 – 205)    | Chronic cardiac disease (33%), Chronic pulmonary disease (22%), Chronic diabetes (77%), Chronic hypertension (55%), obesity (33%), smoking (55%) | Not reported                           |                                                                                                           |
| Patel 2020 (9), Cohort (n= 104), USA, COVID-19#           | HFNC       | Mean ±SD<br>58.9 ±14.2         | All patients on oxygen delivery via HFNT during the hospital course.     | Not reported                                                         | Hypertension (38%), diabetes (35%), cardiovascular disease (20%), lung diseases (26%), CKD (14%)                                                 | Not reported                           | 6/9 (for length of hospital stay); 7/9 (for death and length of ICU stay)<br><br>related to comparability |
|                                                           | IMV        | Mean ±SD<br>63.9 ±11.7         | All patients on oxygen delivery via HFNT during the hospital course.     | Not reported                                                         | Hypertension (57%), diabetes (33%), cardiovascular disease (27%), lung diseases (39%), CKD (21%)                                                 | Not reported                           |                                                                                                           |
| Potalivo 2020 (10), Cohort (n= 520), Italy, COVID-19#     | Oxygen     | Mean ±SD<br>72 ±14.6           | Not reported                                                             | Not reported                                                         | Not reported                                                                                                                                     | Not reported                           | 7/9<br>related to selection, comparability and outcome assessment                                         |
|                                                           | NIV (CPAP) | Mean ±SD<br>64.5 ±12.7         | Not reported                                                             | Not reported                                                         | Not reported                                                                                                                                     | Not reported                           |                                                                                                           |

|                                                          |       |                                                       |                                                                                                                                                                                                                        |                                                                          |                                                                                                                                                                                                                                                                                                                                                                                                         |                                                                                                |                                                                           |
|----------------------------------------------------------|-------|-------------------------------------------------------|------------------------------------------------------------------------------------------------------------------------------------------------------------------------------------------------------------------------|--------------------------------------------------------------------------|---------------------------------------------------------------------------------------------------------------------------------------------------------------------------------------------------------------------------------------------------------------------------------------------------------------------------------------------------------------------------------------------------------|------------------------------------------------------------------------------------------------|---------------------------------------------------------------------------|
|                                                          | IMV   | Mean $\pm$ SD<br>67.3 $\pm$ 9                         | respiratory fatigue, new hemodynamic instability, or worsening of gas exchange notwithstanding oxygen/NIV, also considering prognostic criteria and resources availability (e.g., ICU beds and mechanical ventilators) | PaO <sub>2</sub> /FiO <sub>2</sub> ratio (before IMV):112.5 $\pm$ 50.4   | Not reported                                                                                                                                                                                                                                                                                                                                                                                            | Not reported                                                                                   |                                                                           |
| Sivaloganathan 2020 (11), Cohort (n= 103), UK, COVID-19# | NIV   | Median (IQR)<br>50 (45 – 60)                          | Not reported                                                                                                                                                                                                           | PaO <sub>2</sub> /FiO <sub>2</sub> (median, IQR): 17 (14.3 – 20.4)       | Not reported                                                                                                                                                                                                                                                                                                                                                                                            | Not reported                                                                                   | 9/9                                                                       |
|                                                          | IMV   | Median (IQR)<br>61 (18 – 65)                          | Not reported                                                                                                                                                                                                           | PaO <sub>2</sub> /FiO <sub>2</sub> (median, IQR): 15.3 (12.7 – 18.1)     | Not reported                                                                                                                                                                                                                                                                                                                                                                                            | Not reported                                                                                   |                                                                           |
| Burns 2020 (12), Cohort (n= 28), UK, COVID-19#           | BiPAP | Median (range)<br>81.5 (54 – 91)<br>for entire cohort | Not appropriate for escalation for invasive ventilation. Oxygen saturations not maintaining >94% despite 40% oxygen and a history of ventilatory failure.                                                              | SpO <sub>2</sub> prior to NIPS= 89% (IQR=85–92.75) for the entire cohort | Comorbidities presented overall, not per arm: Hypertension (78.6%), ischaemic heart disease (35.7%), atrial fibrillation (28.6%), congestive cardiac failure (25%), diabetes mellitus (53.6%), chronic kidney disease (53.6%), COPD (17.9%), bronchiectasis (3.6%), asthma (21.4%), active malignancy (10.7%), dementia (3.6%), stroke (7.1%), and previous pulmonary or venous thromboembolism (7.1%). | Imaging ‘Classical’ = 16 (57.1%) and Imaging ‘Indeterminate’ = 8 (28.6%) for the entire cohort | 5/9<br>Concern related to selection of participants and outcome follow-up |
|                                                          | CPAP  | Median (range)<br>81.5 (54 – 91)<br>for entire cohort | Not appropriate for escalation for invasive ventilation. Oxygen saturations not maintaining >94% despite 40% oxygen and a history of ventilatory failure.                                                              | SpO <sub>2</sub> prior to NIPS= 89% (IQR=85–92.75) for the entire cohort | Comorbidities presented overall, not per arm: Hypertension (78.6%), ischaemic heart disease (35.7%), atrial fibrillation (28.6%), congestive cardiac failure (25%), diabetes mellitus (53.6%), chronic kidney disease (53.6%), COPD (17.9%),                                                                                                                                                            | Imaging ‘Classical’ = 16 (57.1%) and Imaging ‘Indeterminate’ = 8 (28.6%) for the entire cohort | 5/9<br>Concern related to selection of participants and outcome follow-up |

|                                                          |                             |                                                  |                                                                                                                                                                                                                                                                                                                     |                         |                                                                                                                                                                                                                                                                                                                                                          |                                 |                                                                           |
|----------------------------------------------------------|-----------------------------|--------------------------------------------------|---------------------------------------------------------------------------------------------------------------------------------------------------------------------------------------------------------------------------------------------------------------------------------------------------------------------|-------------------------|----------------------------------------------------------------------------------------------------------------------------------------------------------------------------------------------------------------------------------------------------------------------------------------------------------------------------------------------------------|---------------------------------|---------------------------------------------------------------------------|
|                                                          |                             |                                                  |                                                                                                                                                                                                                                                                                                                     |                         | bronchiectasis (3.6%), asthma (21.4%), active malignancy (10.7%), dementia (3.6%), stroke (7.1%), and previous pulmonary or venous thromboembolism (7.1%).                                                                                                                                                                                               |                                 |                                                                           |
| Lalla 2020 (13), Cohort (n= 13), South Africa, COVID-19† | HFNC vs IMV (intubation)    | Not reported                                     | Not reported                                                                                                                                                                                                                                                                                                        | Not reported            | Not reported                                                                                                                                                                                                                                                                                                                                             | Not reported                    | 3/9<br>Concern related to selection of participants and outcome follow-up |
| Wang 2020 (14), Cohort (n= 141), China, COVID-19†        | NIV vs IMV (EET)            | Median (IQR)<br>64 (55-70) for the entire cohort | Not reported                                                                                                                                                                                                                                                                                                        | Not reported            | Comorbidities presented overall, not per arm: Hypertension (45%), diabetes (26%), cerebrovascular disease (92%), and coronary artery disease (8.5%)                                                                                                                                                                                                      | Not reported                    | 8/9<br>Concern related to selection of participants                       |
| Hong 2020 (15), Cohort (n= 9), China, COVID-19†          | HFNC                        | Not reported                                     | Not reported                                                                                                                                                                                                                                                                                                        | Not reported            | Not reported                                                                                                                                                                                                                                                                                                                                             | Not reported                    | 7/9<br>Concern related comparability                                      |
|                                                          | IMV (Tracheotomy)           | Not reported                                     | Not reported                                                                                                                                                                                                                                                                                                        | Not reported            | Not reported                                                                                                                                                                                                                                                                                                                                             | Not reported                    |                                                                           |
| Li 2020 (16), RCT (n= 72), China, COVID-19†              | HFNC                        | Mean ±SD<br>32 ±6.42                             | COVID19+ARDS                                                                                                                                                                                                                                                                                                        | PaO2= 63.162 ±3.912mmHg | Not reported                                                                                                                                                                                                                                                                                                                                             | Not reported                    | Some concerns due to randomization process,                               |
|                                                          | SOT                         | Mean ±SD<br>35 ±4.67                             | COVID19+ARDS                                                                                                                                                                                                                                                                                                        | PaO2=62.886 ±3.243mmHg  | Not reported                                                                                                                                                                                                                                                                                                                                             | Not reported                    |                                                                           |
| Oranger 2020 (17), Cohort (n= 66), France, COVID-19†     | NIV (CPAP) + Oxygen therapy | Median (IQR)<br>63 (55 – 70)                     | <ul style="list-style-type: none"> <li>Confirmed SARS-CoV-2 infection</li> <li>ARDS (respiratory rate ≥25, bilateral pulmonary infiltrates on chest X-ray or CTscan, need for standard oxygen between 3 and 6 L.min-1 to maintain SpO2 ≥ 92%). Among them, those requiring escalating oxygen therapy ≥ 6</li> </ul> | SpO2 < 92%              | No significant differences in respiratory and cardiovascular comorbidities, clinical data upon admission (body temperature, heart rate and arterial pression), biological data (white cell count, lymphocyte count, C-reactive protein, procalcitonin, D-dimers) or radiological data (bilateral infiltrates in 100% of cases). Prevalence not reported. | 100% bilateral lung infiltrates | 6/9<br>Concern related to comparability and outcome                       |

|                                                    |                                                    |                              |                                                                                                                                                                                                                                                                                                                                                                             |              |                                                                                                                                                                                                                                                                                                                                                          |                                 |                                                     |
|----------------------------------------------------|----------------------------------------------------|------------------------------|-----------------------------------------------------------------------------------------------------------------------------------------------------------------------------------------------------------------------------------------------------------------------------------------------------------------------------------------------------------------------------|--------------|----------------------------------------------------------------------------------------------------------------------------------------------------------------------------------------------------------------------------------------------------------------------------------------------------------------------------------------------------------|---------------------------------|-----------------------------------------------------|
|                                                    |                                                    |                              | L.min-1 to maintain SpO2 ≥ 92% were included.                                                                                                                                                                                                                                                                                                                               |              |                                                                                                                                                                                                                                                                                                                                                          |                                 |                                                     |
|                                                    | Oxygen therapy                                     | Median (IQR)<br>62 (54 – 72) | <ul style="list-style-type: none"> <li>Confirmed SARS-CoV-2 infection</li> <li>ARDS (respiratory rate ≥25, bilateral pulmonary infiltrates on chest X-ray or CT scan, need for standard oxygen between 3 and 6 L.min-1 to maintain SpO2 ≥ 92%).</li> <li>Among them, those requiring escalating oxygen therapy ≥ 6 L.min-1 to maintain SpO2 ≥ 92% were included.</li> </ul> | SpO2 < 92%   | No significant differences in respiratory and cardiovascular comorbidities, clinical data upon admission (body temperature, heart rate and arterial pression), biological data (white cell count, lymphocyte count, C-reactive protein, procalcitonin, D-dimers) or radiological data (bilateral infiltrates in 100% of cases). Prevalence not reported. | 100% bilateral lung infiltrates |                                                     |
| Shang 2020 (18), Cohort (n= 416), China, COVID-19† | NIV, IMV, SOT (helmet, oronasal or full-face mask) | Not reported                 | <ul style="list-style-type: none"> <li>Not reported</li> </ul>                                                                                                                                                                                                                                                                                                              | Not reported | Not reported                                                                                                                                                                                                                                                                                                                                             | Not reported                    | 7/9<br>Concern related to comparability             |
| Tang 2020 (19), Cohort (n= 7), China, COVID-19†    | NIV                                                | Not reported                 | <ul style="list-style-type: none"> <li>Not reported</li> </ul>                                                                                                                                                                                                                                                                                                              | Not reported | Not reported                                                                                                                                                                                                                                                                                                                                             | Not reported                    | 6/9<br>Concern related to comparability and outcome |
|                                                    | HFNC                                               | Not reported                 | <ul style="list-style-type: none"> <li>Not reported</li> </ul>                                                                                                                                                                                                                                                                                                              | Not reported | Not reported                                                                                                                                                                                                                                                                                                                                             | Not reported                    |                                                     |
| Zheng 2020 (20), Cohort (n= 34), China, COVID-19†  | NIV                                                | Median (IQR)<br>66 (51 – 72) | <ul style="list-style-type: none"> <li>Not reported</li> </ul>                                                                                                                                                                                                                                                                                                              | Not reported | 63.2%Hypertension, 21.1%Diabetes, 5.3%Cardiovascular disease, 5.3%CPD, 15.8%Chronic liver disease, 5.3%Chronic kidney disease                                                                                                                                                                                                                            | Not reported                    | 7/9<br>Concern related to comparability             |
|                                                    | IMV                                                | Median (IQR)<br>71 (60 – 83) | <ul style="list-style-type: none"> <li>Not reported</li> </ul>                                                                                                                                                                                                                                                                                                              | Not reported | 66.7%Hypertension, 26.7%Diabetes, 20.0%Cardiovascular disease, 6.7%CPD, 6.7%Chronic liver disease, 6.7%Chronic kidney disease                                                                                                                                                                                                                            | Not reported                    |                                                     |



|                                                               |                                        |                                  |                                                                                                                                                                                                                        |                                                      |                                                                                                          |                                |                                                                                      |
|---------------------------------------------------------------|----------------------------------------|----------------------------------|------------------------------------------------------------------------------------------------------------------------------------------------------------------------------------------------------------------------|------------------------------------------------------|----------------------------------------------------------------------------------------------------------|--------------------------------|--------------------------------------------------------------------------------------|
| Duca 2020 (21), Cohort (n = 320), Italy, COVID-19 (preprint)* | CPAP (Helmet)                          | Mean $\pm$ SD<br>69 $\pm$ 11.5   | Hypoxic and/or dyspneic on 15 L/min nonrebreather mask                                                                                                                                                                 | Not reported                                         | Not reported                                                                                             | Not reported                   | 6/9<br>Concern related to the comparability of the arms and outcome follow-up        |
|                                                               | NIV                                    | Mean $\pm$ SD<br>71 $\pm$ 12     | Hypoxic and/or dyspneic on 15 L/min nonrebreather mask                                                                                                                                                                 | Not reported                                         | Not reported                                                                                             | Not reported                   |                                                                                      |
|                                                               | IMV                                    | Mean $\pm$ SD<br>69 $\pm$ 12     | Hypoxic and/or dyspneic on 15 L/min nonrebreather mask                                                                                                                                                                 | Not reported                                         | Not reported                                                                                             | Not reported                   |                                                                                      |
| He 2020 (22), Cohort (n= 37), China, COVID-19*                | SOT vs HFNC vs NIV                     | Not reported                     | Not reported                                                                                                                                                                                                           | Not reported                                         | Not reported                                                                                             | Not reported                   | 6/9<br>Concern related to selection and comparability of the arms                    |
| Hua 2020 (23), Cohort (n= 45), China, COVID-19*               | HFNC                                   | Mean $\pm$ SD<br>38.1 $\pm$ 0.7  | Not reported                                                                                                                                                                                                           | Not reported                                         | Not reported                                                                                             | Not reported                   | 5/9<br>Concern related to selection, comparability of the arms and outcome follow-up |
|                                                               | SOT                                    | Mean $\pm$ SD<br>37.8 $\pm$ 0.8  | Not reported                                                                                                                                                                                                           | Not reported                                         | Not reported                                                                                             | Not reported                   |                                                                                      |
| Liao 2020 (24), Cohort (n = 81), China, COVID-19 (preprint)*  | HFNC, NIV, SOT (nasal catheter & mask) | Median (IQR)<br>50 (39 – 65)     | Dyspnea with respiratory rate $\geq$ 30; pulse oxygenation < 93%; PaO <sub>2</sub> :FiO <sub>2</sub> < 300; lung infiltrates >50% within 24 to 48 hours; respiratory failure, septic shock, and/or multi-organ failure | PaO <sub>2</sub> :FiO <sub>2</sub> ratio (<300 mmHg) | Hypertension (18.5%), Diabetes (22.2%), chronic pulmonary disease (13.6%), chronic heart failure (4.9%), | Lung infiltrates > 50% in 4.9% | 5/9<br>Concern related to selection, comparability of the arms and outcome follow-up |
| Liu 2020 (25), Cohort (n= 47), China, COVID-19*               | NIV vs IMV                             | Age >60 years: 89%               | Not reported                                                                                                                                                                                                           | Not reported                                         | Heart failure (51.1%), renal failure (31.2%)                                                             | Not reported                   | 4/9<br>Concern related to selection, comparability, and outcome follow up            |
| Liu 2020 (26), Cohort (n= 32), China, COVID-19*               | NIV vs HFNC                            | Not reported                     | Not reported                                                                                                                                                                                                           | Not reported                                         | Not reported                                                                                             | Not reported                   | 5/9<br>Concern related to selection, comparability, and outcome follow up            |
| Mo 2020 (27), Cohort (n= 38), China, COVID-19*                | HFNC                                   | Mean $\pm$ SD<br>59.8 $\pm$ 10.6 | Not reported                                                                                                                                                                                                           | Not reported                                         | Not reported                                                                                             | Not reported                   | 6/9<br>Concern related to selection and                                              |

|                                                   |                              |                                                   |                                                                                                                                                                               |                                                                                                                                   |                                                                                                                                                                                                                                                |                               |                                                                                         |
|---------------------------------------------------|------------------------------|---------------------------------------------------|-------------------------------------------------------------------------------------------------------------------------------------------------------------------------------|-----------------------------------------------------------------------------------------------------------------------------------|------------------------------------------------------------------------------------------------------------------------------------------------------------------------------------------------------------------------------------------------|-------------------------------|-----------------------------------------------------------------------------------------|
|                                                   |                              |                                                   |                                                                                                                                                                               |                                                                                                                                   |                                                                                                                                                                                                                                                |                               | comparability of arms                                                                   |
|                                                   | SOT                          | Mean $\pm$ SD<br>60.3 $\pm$ 16.3                  | Not reported                                                                                                                                                                  | Not reported                                                                                                                      | Not reported                                                                                                                                                                                                                                   | Not reported                  |                                                                                         |
| Wang 2020 (28), Cohort (n = 27), China, COVID-19* | HFNC                         | Median (IQR)<br>65 (56 – 75)                      | <ul style="list-style-type: none"> <li>Patients with pneumonia secondary to COVID-19 who required HFNC, NIV or invasive ventilation (severe respiratory failure)..</li> </ul> | At baseline, the number of patients with PaO <sub>2</sub> / FiO <sub>2</sub> > 200 and $\leq$ 200 mmHg was 6 and 11, respectively | Hypertension (18%), Diabetes (18%), Chronic heart failure (18%)                                                                                                                                                                                | Pulmonary infiltrates<br>100% | 6/9<br>Concern related to selection and comparability of the arms and outcome follow-up |
|                                                   | NIV                          | Not reported                                      | <ul style="list-style-type: none"> <li>Not reported</li> </ul>                                                                                                                | Not reported                                                                                                                      | Not reported                                                                                                                                                                                                                                   | Not reported                  |                                                                                         |
| Wang 2020 (29), Cohort (n= 548), China, COVID-19* | NIV vs IMV vs HFNC           | Not reported                                      | <ul style="list-style-type: none"> <li>Not reported</li> </ul>                                                                                                                | Not reported                                                                                                                      | Baseline data available only for initial cohort with 548 pts:<br>Comorbidities n (%):<br>Hypertension 166 (30),<br>coronary heart disease 34 (6),<br>diabetes mellitus 83 (15),<br>chronic kidney disease 10 (2),<br>asthma 5 (1), COPD 17 (3) | Not reported                  | 6/9<br>Concern related to selection and comparability of the arms                       |
| Wu 2020 (30), Cohort (n = 201), China, COVID-19*  | SOT, NIV, IMV, IMV with ECMO | Median (IQR)<br>51 (43 – 60)<br>for entire cohort | <ul style="list-style-type: none"> <li>not reported</li> </ul>                                                                                                                | not reported                                                                                                                      | not reported                                                                                                                                                                                                                                   | not reported                  | 6/9<br>Concern related to selection and comparability of the arms                       |

\*: initial review (grey). †: first update (green). ‡: second update (blue). #: current update (orange). CPAP: continuous positive airway pressure. NIV: noninvasive mechanical ventilation; IMV: invasive mechanical ventilation; MV: mechanical ventilation; ECMO; Extracorporeal membrane oxygenation; SOT: standard oxygen therapy; HFNC; High flow oxygen by nasal canula. Risk of bias per outcome for randomized studies was assessed using the Cochrane Risk of Bias 2.0 tool (overall risk of bias rating is presented here); risk of bias for non-randomized studies was assessed using Newcastle-Ottawa scale (overall risk of bias rating is presented here).

Supplement Table 2. Results of randomized, adjusted and unadjusted studies of COVID-19 patients comparing no ventilation, invasive mechanical ventilation and non-invasive mechanical ventilation by hard outcome and subgroups

| Comparison     | Name of study                                                                                                         | Outcome (duration follow-up)            | Intervention | Comparator | Effect estimate [OR (95%CI)] with subgroups or narrative for adjusted studies |
|----------------|-----------------------------------------------------------------------------------------------------------------------|-----------------------------------------|--------------|------------|-------------------------------------------------------------------------------|
| BiPAP vs CPAP  | Burns 2020 (12), Cohort (n= 28), UK, COVID-19†                                                                        | Mortality (30 days)                     | 12/23        | 2/5        | n.r                                                                           |
| CPAP vs oxygen | Kanthimathinathan 2020 (6), Cohort (n= 45), UK, COVID-19#<br><br>Oranger 2020 (17), Cohort (n= 66), France, COVID-19† | Mortality (41 days)                     | 0/1          | 0/9        | n.r                                                                           |
|                |                                                                                                                       | Mortality (7 days)                      | 0/38         | 2/14       | n.r                                                                           |
|                |                                                                                                                       | Mortality (14 days)                     | 0/38         | 2/14       | n.r                                                                           |
|                |                                                                                                                       | Need for invasive ventilation (7 days)  | 9/38         | 6/14       | n.r                                                                           |
|                |                                                                                                                       | Need for invasive ventilation (14 days) | 9/38         | 6/14       | n.r                                                                           |
| CPAP vs IMV    | Kanthimathinathan 2020 (6), Cohort (n= 45), UK, COVID-19#<br><br>Khalil 2020 (7), Cohort (n= 220), UK, COVID-19#      | Mortality (41 days)                     | 0/1          | 0/1        | n.r                                                                           |
|                |                                                                                                                       | Mortality (28 days)                     | 15/41        | 13/34      | n.r                                                                           |
| CPAP vs HFNC   | Duan 2020 (1), Cohort (n= 36), China, COVID-19#                                                                       | Mortality (90 days)                     | 1/13         | 1/23       | n.r                                                                           |
|                | Duan 2020 (1), Cohort (n= 36), China, COVID-19#                                                                       | Need for invasive ventilation (90 days) | 2/13         | 4/23       | n.r                                                                           |
|                | Franco 2020 (2), Cohort (n= 670), Italy, COVID-19#                                                                    | Mortality (30 days)                     | 100/330      | 26/163     | n.r                                                                           |
|                | Franco 2020 (2), Cohort (n= 670), Italy, COVID-19#                                                                    | Need for invasive ventilation (71 days) | 82/330       | 47/163     | n.r                                                                           |
|                | Franco 2020 (2), Cohort (n= 670), Italy, COVID-19#                                                                    | Length of hospital stay (71 day)        | 19.8 ±12.1   | 19.2 ±13.3 | n.r                                                                           |

|                |                                                              |                                                                          |            |            |     |
|----------------|--------------------------------------------------------------|--------------------------------------------------------------------------|------------|------------|-----|
|                | Kanthimathinathan 2020 (6), Cohort (n= 45), UK, COVID-19#    | Mortality (41 days)                                                      | 0/1        | 0/2        | n.r |
|                | He 2020 (22), Cohort (n= 37), China, COVID-19*               | Need for invasive ventilation (n.r)                                      | 2/6        | 2/21       | n.r |
|                | Liu 2020 (25), Cohort (n= 32), China, COVID-19*              | Hospital mortality (n.r)                                                 | 3/10       | 0/8        | n.r |
|                |                                                              | Need for invasive ventilation (n.r)                                      | 1/10       | 0/8        | n.r |
|                | Wang 2020 (28), Cohort (n = 27), China, COVID-19*            | Need for invasive ventilation (n.r)                                      | 1/9        | 2/17       | n.r |
|                | Liao 2020 (24), Cohort (n = 81), China, COVID-19 (preprint)* | Recovery (28 days)                                                       | 5/8        | 8/13       | n.r |
| CPAP vs NIV    | Franco 2020 (2), Cohort (n= 670), Italy, COVID-19#           | Mortality (30 days)                                                      | 100/330    | 54/177     | n.r |
|                | Franco 2020 (2), Cohort (n= 670), Italy, COVID-19#           | Need for invasive ventilation (71 days)                                  | 82/330     | 49/177     | n.r |
|                | Franco 2020 (2), Cohort (n= 670), Italy, COVID-19#           | Length of hospital stay (71 day)                                         | 19.8 ±12.1 | 21.5 ±15.1 | n.r |
|                | Khalil 2020 (7), Cohort (n= 220), UK, COVID-19#              | Mortality (28 days)                                                      | 15/41      | 2/4        | n.r |
| HFNC vs oxygen | Kanthimathinathan 2020 (6), Cohort (n= 45), UK, COVID-19#    | Mortality (41 days)                                                      | 0/2        | 0/9        | n.r |
|                | Li 2020 (16), RCT (n= 72), China, COVID-19†                  | Need for invasive ventilation (12 h)                                     | 1/37       | 6/35       | n.r |
|                | He 2020 (22), Cohort (n= 37), China, COVID-19*               | Need for invasive ventilation (n.r)                                      | 2/21       | 1/10       | n.r |
|                | Hua 2020 (23), Cohort (n= 45), China, COVID-19*              | Time to improvement in CT in days (absorption of lesion area ≥ 30% (n.r) | 4.8±2.4    | 8±2.8      | n.r |
|                | Mo 2020 , Cohort (n= 38), China, COVID-19*                   | Need for invasive ventilation (n.r)                                      | 5/22       | 5/16       | n.r |
|                | Liao 2020 (24), Cohort (n = 81), China,                      | Recovery (28 days)                                                       | 5/8        | 3/4 (mask) | n.r |

|             |                                                              |                                          |              |               |                          |
|-------------|--------------------------------------------------------------|------------------------------------------|--------------|---------------|--------------------------|
|             | COVID-19 (preprint)*                                         |                                          |              |               |                          |
|             | Liao 2020 (24), Cohort (n = 81), China, COVID-19 (preprint)* | Recovery (28 days)                       | 5/8          | 34/51 (nasal) | n.r                      |
| HFNC vs NIV | Grieco 2021 (4), RCT (n= 110), Italy, COVID-19#              | Mortality (28 days)                      | 10/55        | 8/54          | n.r                      |
|             | Grieco 2021 (4), RCT (n= 110), Italy, COVID-19#              | Mortality (60 days)                      | 12/55        | 13/54         | n.r                      |
|             | Grieco 2021 (4), RCT (n= 110), Italy, COVID-19#              | ICU mortality (n.r.)                     | 14/55        | 11/54         | n.r                      |
|             | Grieco 2021 (4), RCT (n= 110), Italy, COVID-19#              | In-hospital mortality (n.r.)             | 14/55        | 13/54         | n.r                      |
|             | Grieco 2021 (4), RCT (n= 110), Italy, COVID-19#              | Need for invasive ventilation (28 days)  | 28/55        | 16/54         | HR:<br>2.04 (1.12 – 3.7) |
|             | Grieco 2021 (4), RCT (n= 110), Italy, COVID-19#              | Length of hospital stay (n.r.)           | 22 (13 – 44) | 21 (14 – 30)  | n.r                      |
|             | Grieco 2021 (4), RCT (n= 110), Italy, COVID-19#              | Length of ICU stay (n.r.)                | 10 (5 – 23)  | 9 (4 – 17)    | n.r                      |
|             | Grieco 2021 (4), RCT (n= 110), Italy, COVID-19#              | Respiratory support-free days (n.r.)     | 18 (0 – 22)  | 20 (0 – 25)   | n.r                      |
|             | Grieco 2021 (4), RCT (n= 110), Italy, COVID-19#              | Invasive ventilation-free days (28 days) | 25 (4 – 28)  | 28 (13 – 28)  | n.r                      |
|             | Grieco 2021 (4), RCT (n= 110), Italy, COVID-19#              | Invasive ventilation-free days (60 days) | 60 (43 – 60) | 57 (19 – 60)  | n.r                      |
|             | Franco 2020 (2), Cohort (n= 670), Italy, COVID-19#           | Mortality (30 days)                      | 26/163       | 54/177        | n.r                      |
|             | Franco 2020 (2), Cohort (n= 670), Italy, COVID-19#           | Need for invasive ventilation (71 days)  | 47/163       | 49/177        | n.r                      |
|             | Franco 2020 (2), Cohort (n= 670), Italy, COVID-19#           | Length of hospital stay (71 day)         | 19.2 ±13.3   | 21.5 ±15.1    | n.r                      |

|             |                                                           |                                  |                              |                              |                                       |
|-------------|-----------------------------------------------------------|----------------------------------|------------------------------|------------------------------|---------------------------------------|
|             | Tang 2020 (19), Cohort (n=7), China, COVID-19†            | Mortality (n.r.0)                | 0/5                          | 1/2                          | n.r                                   |
| HFNC vs IMV | Kanthimathinathan 2020 (6), Cohort (n= 45), UK, COVID-19# | Mortality (41 days)              | 0/2                          | 0/1                          | n.r                                   |
|             | Patel 2020 (9), Cohort (n= 104), USA, COVID-19#           | Mortality (10 days)              | 2/67                         | 13/27                        | n.r                                   |
|             | Patel 2020 (9), Cohort (n= 104), USA, COVID-19#           | Length of hospital stay (10 day) | 9.7 ±4.6                     | 13.67 ±7.97                  | n.r                                   |
|             | Patel 2020 (9), Cohort (n= 104), USA, COVID-19#           | Length of ICU stay (10 day)      | 4.05 ±2.64                   | 10.45 ±6.12                  | n.r                                   |
|             | Lalla 2020 (13), Cohort (n= 13), South Africa, COVID-19‡  | Mortality (n.r.)                 | 1/7                          | 6/6                          | n/a                                   |
|             | Hong 2020 (15), Cohort (n= 9), China, COVID-19†           | Hospital Mortality (n.r)         | 0/8                          | 0/1                          | n.r                                   |
|             | Wang 2020 (29), Cohort (n= 548), China, COVID-19*         | Mortality (15 days)              | 9/24                         | 16/25                        | HR<br>1.11 (0.43 – 2.83) <sup>1</sup> |
| NIV vs IMV  | Khalil 2020 (7), Cohort (n= 220), UK, COVID-19#           | Mortality (28 days)              | 2/4                          | 13/34                        | n.r                                   |
|             | Grasselli 2020 (3), Cohort (n= 3988), Italy, COVID-19#    | Mortality (n.r.)                 | 127/350                      | 1514/2929                    | HR<br>0.81 (0.65 – 1) <sup>2</sup>    |
|             | Gundem 2020 (5), Cohort (n= 26), Norway, COVID-19#        | Mortality (83 days)              | 0/4                          | 2/11                         | n.r                                   |
|             | Gundem 2020 (5), Cohort (n= 26), Norway, COVID-19#        | Length of hospital stay (83 day) | Mean (range)<br>15 (12 – 18) | Mean (range)<br>32 (17 – 65) | n.r                                   |
|             | Gundem 2020 (5), Cohort (n= 26), Norway, COVID-19#        | Length of ICU stay (83 day)      | Mean (range)<br>5 (2 – 7)    | Mean (range)<br>25 (10 – 56) | n.r                                   |

|                                                              |                                        |                                  |                            |                                        |
|--------------------------------------------------------------|----------------------------------------|----------------------------------|----------------------------|----------------------------------------|
| Mukhtar 2020 (8), Cohort (n= 55), South Africa, COVID-19#    | Mortality (46 days)                    | 3/30                             | 7/9                        | n.r                                    |
| Mukhtar 2020 (8), Cohort (n= 55), South Africa, COVID-19#    | Length of ICU stay (46 day)            | Median (IQR)<br>7 (4 – 8)        | Median (IQR)<br>7 (3 – 18) | n.r                                    |
| Potalivo 2020 (10), Cohort (n= 520), Italy, COVID-19#        | Mortality (60 days)                    | 9/46                             | 15/41                      | HR<br>0.6 (0.356 – 1.011) <sup>3</sup> |
| Sivaloganathan 2020 (11), Cohort (n= 103), UK, COVID-19#     | Mortality (71 days)                    | 0/31                             | 6/21                       | n.r                                    |
| Wang 2020 (14), Cohort (n= 141), China, COVID-19‡            | Mortality (n.r.)                       | n.r                              | n.r                        | 0.34 (0.16 – 0.71) <sup>4</sup>        |
| Shang 2020 (18), Cohort (n= 416), China, COVID-19†           | Mortality (n.r)                        | 19/68                            | 12/14                      | n.r                                    |
| Zheng 2020 (20), Cohort (n= 34), China, COVID-19†            | Mortality (n.r)                        | 0/19                             | 0/15                       | n.r                                    |
| Duca 2020 (21), Cohort (n = 320) Italy, COVID-19 (preprint)* | Mortality (up to 24 days)              | 46/71 (Helmet CPAP)<br>4/7 (NIV) | 2/7                        | n.r.                                   |
| Liu 2020 (25), Cohort (n= 47), China, COVID-19*              | Length of hospital stay (Before death) | 7 (4 – 9.75)                     | 13 (7 – 21)                | n.r.                                   |
| Wang 2020 (29), Cohort (n= 548), China, COVID-19*            | Mortality (15 days)                    | 46/78                            | 16/25                      | HR<br>1.61 (0.84 – 3.09) <sup>1</sup>  |
| Wu 2020 (30), Cohort (n = 201), China, COVID-19*             | Mortality (n.r.)                       | 38/61                            | 5/5                        | n.r.                                   |

|                                                     |                                                              |                                         |                              |                             |                                       |
|-----------------------------------------------------|--------------------------------------------------------------|-----------------------------------------|------------------------------|-----------------------------|---------------------------------------|
| NIV vs oxygen                                       | Grasselli 2020 (3), Cohort (n= 3988), Italy, COVID-19#       | Mortality (n.r.)                        | 127/350                      | 13/76                       | HR<br>0.55 (0.17 – 1.75) <sup>2</sup> |
|                                                     | Gundem 2020 (5), Cohort (n= 26), Norway, COVID-19#           | Mortality (83 days)                     | 0/4                          | 0/7                         | n.r                                   |
|                                                     | Gundem 2020 (5), Cohort (n= 26), Norway, COVID-19#           | Length of hospital stay (83 day)        | Mean (range)<br>15 (12 – 18) | Mean (range)<br>14 (6 – 24) | n.r                                   |
|                                                     | Gundem 2020 (5), Cohort (n= 26), Norway, COVID-19#           | Length of ICU stay (83 day)             | Mean (range)<br>5 (2 – 7)    | Mean (range)<br>4 (2 – 8)   | n.r                                   |
|                                                     | Mukhtar 2020 (8), Cohort (n= 55), South Africa, COVID-19#    | Mortality (46 days)                     | 3/30                         | 0/16                        | n.r                                   |
|                                                     | Mukhtar 2020 (8), Cohort (n= 55), South Africa, COVID-19#    | Length of ICU stay (46 day)             | Median (IQR)<br>7 (4 – 8)    | Median (IQR)<br>3 (2 – 3)   | n.r                                   |
|                                                     | Potalivo 2020 (10), Cohort (n= 520), Italy, COVID-19#        | Mortality (60 days)                     | 9/46                         | 94/408                      | HR<br>1.77 (0.79 – 3.98) <sup>3</sup> |
|                                                     | Potalivo 2020 (10), Cohort (n= 520), Italy, COVID-19#        | Need for invasive ventilation (60 days) | 25/71                        | 32/440                      | n.r                                   |
| NIV vs no IMV including conventional oxygen therapy | Liao 2020 (24), Cohort (n = 81), China, COVID-19 (preprint)* | Recovery (28 days)                      | 8/13                         | 3/4 (mask)                  | n.r                                   |
|                                                     | Liao 2020 (24), Cohort (n = 81), China, COVID-19 (preprint)* | Recovery (28 days)                      | 8/13                         | 34/51 (nasal catheter)      | n.r                                   |
|                                                     | He 2020 (22), Cohort (n= 37), China, COVID-19*               | Need for invasive ventilation (n.r)     | 2/6                          | 1/10                        | n/a                                   |

\*: initial review. †: first update. ‡: second update. #: current update. CPAP: continuous positive airway pressure. NIV: noninvasive mechanical ventilation; IMV: invasive mechanical ventilation; MV: mechanical ventilation; ECMO; Extracorporeal membrane oxygenation; SOT: standard oxygen therapy; HFNC; High flow oxygen by nasal canula; HCW: healthcare worker; ICU: intensive care unit; NIPPV: noninvasive positive pressure ventilation

a: median (IQR);

b: median (minimum & maximum)

1: adjusted by: age, SaO<sub>2</sub>, WBC count, lymphocyte count, LDH, multi-organ dysfunction, treatment with corticosteroids, arbidol, ribavirin, & lopinavir/ritonavir



2: adjusted by: age, sex, hypertension, heart disease, hypercholesterolemia, Diabetes T2, malignancy, COPD, FiO<sub>2</sub>, PaO<sub>2</sub>/ FiO<sub>2</sub>, PEEP at admission, statin, & ACE, ARB, & Diuretics therapy

3: adjusted by age, sex, and administration of steroids, canakinumab, and tocilizumab

4: adjusted by: age, sex, D-dimer, prothrombin time, CRP

5: Adjusted for age, baseline PaO<sub>2</sub>/FiO<sub>2</sub>, number of comorbidities and steroid usage

Supplement Table 3. Evidence Profile Non-invasive ventilation compared to invasive mechanical ventilation for COVID-19 and acute hypoxemic respiratory failure

Author(s) of this table: Giovanna Elsa Ute Muti Schuenemann, Assem Khamis, Karla Solo, Holger Schünemann

Question: Non-invasive ventilation compared to invasive mechanical ventilation for COVID-19 and acute hypoxemic respiratory failure

**Bibliography:**

1. Grasselli G, Greco M, Zanella A, Albano G, Antonelli M, Bellani G, et al. Risk Factors Associated With Mortality Among Patients With COVID-19 in Intensive Care Units in Lombardy, Italy. JAMA Intern Med. 2020;180(10):1345-55.
2. Potalivo A, Montomoli J, Facondini F, Sanson G, Lazzari Agli LA, Perin T, et al. Sixty-Day Mortality Among 520 Italian Hospitalized COVID-19 Patients According to the Adopted Ventilatory Strategy in the Context of an Integrated Multidisciplinary Clinical Organization: A Population-Based Cohort Study. Clin Epidemiol. 2020;12:1421-31.
3. Wang T, Tang C, Chen R, Ruan H, Liang W, Guan W, et al. Clinical Features of Coronavirus Disease 2019 Patients With Mechanical Ventilation: A Nationwide Study in China. Crit Care Med. 2020;48(9):e809-e12
4. Wang K, Zhang Z, Yu M, Tao Y, Xie M. 15-day mortality and associated risk factors for hospitalized patients with COVID-19 in Wuhan, China: an ambispective observational cohort study. Intensive Care Med. 2020.

| Certainty assessment |              |              |               |              |             |                      | Impact | Certainty | Importance |
|----------------------|--------------|--------------|---------------|--------------|-------------|----------------------|--------|-----------|------------|
| No of studies        | Study design | Risk of bias | Inconsistency | Indirectness | Imprecision | Other considerations |        |           |            |

**Mortality (at different time intervals)**

|   |                       |                      |              |                      |                      |      |                                                                                                   |                  |          |
|---|-----------------------|----------------------|--------------|----------------------|----------------------|------|---------------------------------------------------------------------------------------------------|------------------|----------|
| 4 | observational studies | serious <sup>a</sup> | very serious | serious <sup>b</sup> | Serious <sup>c</sup> | none | The meta-analysis of hazard ratios these four studies showed a hazard ratio of 0.74 (0.46, 1.18). | ⊕○○○<br>Very low | CRITICAL |
|---|-----------------------|----------------------|--------------|----------------------|----------------------|------|---------------------------------------------------------------------------------------------------|------------------|----------|

CI: confidence interval

**Explanations**

- a. There are concerns regarding selection of participants (possible selection bias).
- b. There are concerns regarding the assessment of the outcome (duration of follow up).
- c. There was unexplained inconsistency in the study results.

Supplement Table 4. Evidence Profile non-invasive ventilation compared to oxygen only for COVID-19 and acute hypoxemic respiratory failure

Author(s) of this table: Giovanna Elsa Ute Muti Schuenemann, Assem Khamis, Karla Solo, Holger Schünemann

Question: Non-invasive ventilation compared to no mechanical ventilation for COVID-19 and acute hypoxemic respiratory failure

Bibliography:

1. Grasselli G, Greco M, Zanella A, Albano G, Antonelli M, Bellani G, et al. Risk Factors Associated With Mortality Among Patients With COVID-19 in Intensive Care Units in Lombardy, Italy. JAMA Intern Med. 2020;180(10):1345-55.
2. Potalivo A, Montomoli J, Facondini F, Sanson G, Lazzari Agli LA, Perin T, et al. Sixty-Day Mortality Among 520 Italian Hospitalized COVID-19 Patients According to the Adopted Ventilatory Strategy in the Context of an Integrated Multidisciplinary Clinical Organization: A Population-Based Cohort Study. Clin Epidemiol. 2020;12:1421-31.

| Certainty assessment |              |              |               |              |             |                      | Impact | Certainty | Importance |
|----------------------|--------------|--------------|---------------|--------------|-------------|----------------------|--------|-----------|------------|
| No of studies        | Study design | Risk of bias | Inconsistency | Indirectness | Imprecision | Other considerations |        |           |            |

Mortality

|   |                       |                      |                      |             |         |      |                                                                                                                                                                                                                                                         |                  |          |
|---|-----------------------|----------------------|----------------------|-------------|---------|------|---------------------------------------------------------------------------------------------------------------------------------------------------------------------------------------------------------------------------------------------------------|------------------|----------|
| 2 | observational studies | serious <sup>a</sup> | serious <sup>b</sup> | not serious | serious | none | The meta-analysis showed a pooled HR of 1.07 (0.34, 3.34). Individually, both studies demonstrated conflicting results where Grasselli et al. showed a hazard ratio of 0.55 (0.17, 1.77) and Potalivo demonstrated a hazard ratio of 1.78 (0.79, 3.98). | ⊕○○○<br>Very low | CRITICAL |
|---|-----------------------|----------------------|----------------------|-------------|---------|------|---------------------------------------------------------------------------------------------------------------------------------------------------------------------------------------------------------------------------------------------------------|------------------|----------|

CI: confidence interval

Explanations

- a. Concerns regarding comparability of interventions and outcome assessment.
- b. There was unexplained inconsistency in the study results
- c. The confidence interval of the pooled effect is wide. Although this is in part due to inconsistency, the number of participants and events is also small and we rated down for imprecision in addition to inconsistency.

Supplement Figure 2. Forest plot showing adjusted HRs of NIV (vs IMV) for mortality (4 studies included; Grasselli 2020 and Potalivo 2020 are the newly added studies).

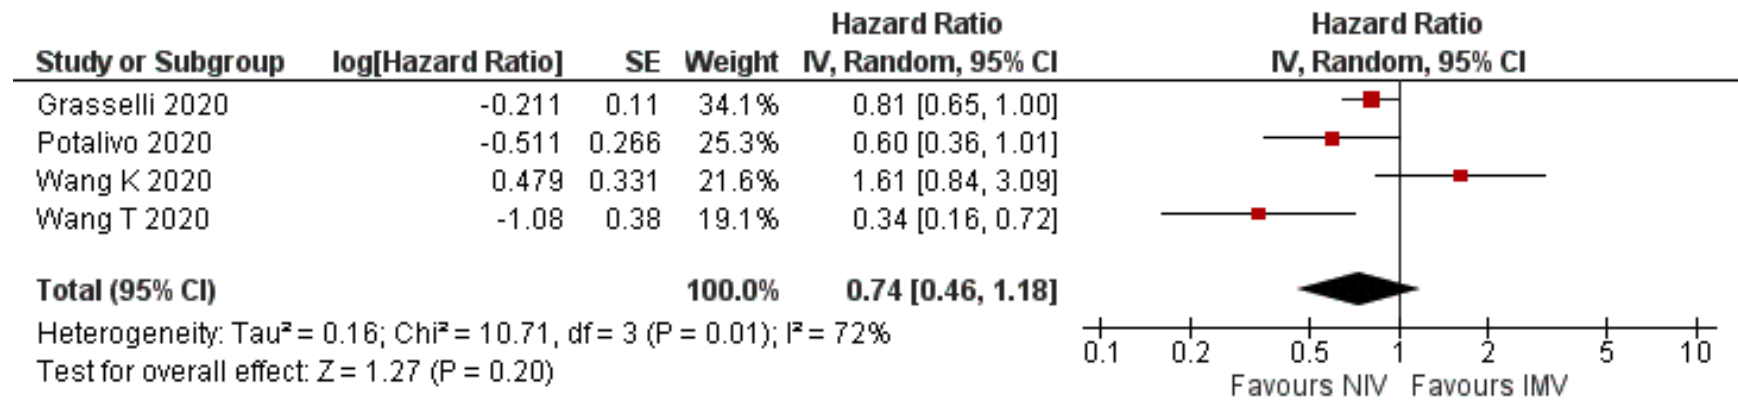

**Supplement Figure 3.** Forest plot showing adjusted HRs of NIV (vs no MV) for mortality (2 studies included; Grasselli 2020 and Potalivo 2020 are the newly added studies).

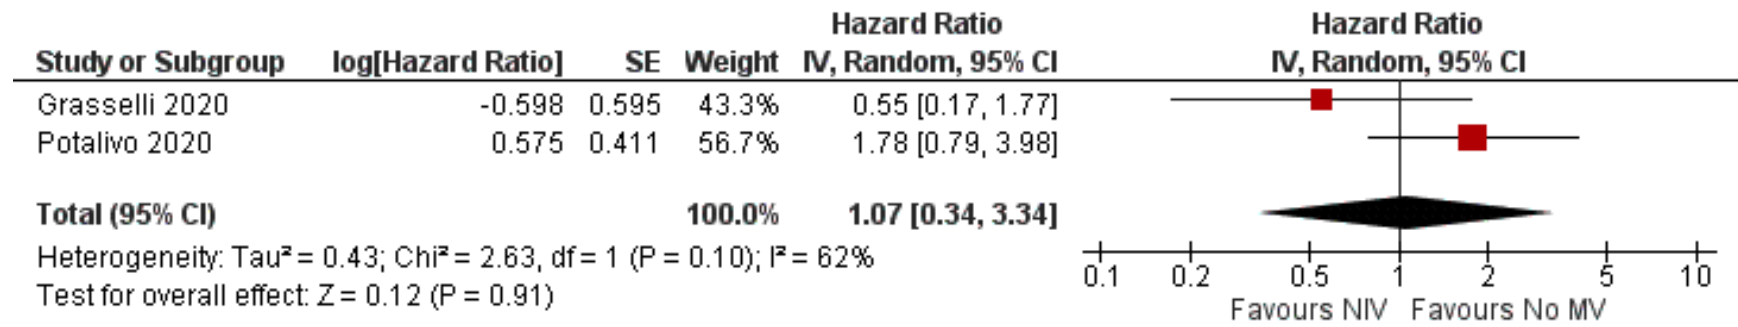

#### References:

1. Duan J, Chen B, Liu X, Shu W, Zhao W, Li J, et al. Use of high-flow nasal cannula and noninvasive ventilation in patients with COVID-19: A multicenter observational study. *Am J Emerg Med.* 2020.
2. Franco C, Facciolongo N, Tonelli R, Dongilli R, Vianello A, Pisani L, et al. Feasibility and clinical impact of out-of-ICU noninvasive respiratory support in patients with COVID-19-related pneumonia. *Eur Respir J.* 2020;56(5).
3. Grasselli G, Greco M, Zanella A, Albano G, Antonelli M, Bellani G, et al. Risk Factors Associated With Mortality Among Patients With COVID-19 in Intensive Care Units in Lombardy, Italy. *JAMA Intern Med.* 2020;180(10):1345-55.
4. Grieco DL, Menga LS, Cesarano M, Rosa T, Spadaro S, Bitondo MM, et al. Effect of Helmet Noninvasive Ventilation vs High-Flow Nasal Oxygen on Days Free of Respiratory Support in Patients With COVID-19 and Moderate to Severe Hypoxemic Respiratory Failure: The HENIVOT Randomized Clinical Trial. *JAMA.* 2021;325(17):1731-43.
5. Gundem T, Olasveengen TM, Hovda KE, Gaustad K, Schondorf C, Rostrup M, et al. Ventilatory support for hypoxaemic intensive care patients with COVID-19. *Tidsskr Nor Laegeforen.* 2020;140(11).
6. Kanthimathinathan HK, Dhesi A, Hartshorn S, Ali SH, Kirk J, Nagakumar P, et al. COVID-19: A UK Children's Hospital Experience. *Hosp Pediatr.* 2020;10(9):802-5.
7. Khalil K, Agbontaen K, McNally D, Love A, Mandalia S, Banya W, et al. Clinical characteristics and 28-day mortality of medical patients admitted with COVID-19 to a central London teaching hospital. *J Infect.* 2020;81(3):e85-e9.
8. Mukhtar A, Lotfy A, Hasanin A, El-Hefnawy I, El Adawy A. Outcome of non-invasive ventilation in COVID-19 critically ill patients: A Retrospective observational Study. *Anaesth Crit Care Pain Med.* 2020;39(5):579-80.
9. Patel M, Gangemi A, Marron R, Chowdhury J, Yousef I, Zheng M, et al. Retrospective analysis of high flow nasal therapy in COVID-19-related moderate-to-severe hypoxaemic respiratory failure. *BMJ Open Respir Res.* 2020;7(1).
10. Potalivo A, Montomoli J, Facondini F, Sanson G, Lazzari Agli LA, Perin T, et al. Sixty-Day Mortality Among 520 Italian Hospitalized COVID-19 Patients According to the Adopted Ventilatory Strategy in the Context of an Integrated Multidisciplinary Clinical Organization: A Population-Based Cohort Study. *Clin Epidemiol.* 2020;12:1421-31.
11. Sivaloganathan AA, Nasim-Mohi M, Brown MM, Abdul N, Jackson A, Fletcher SV, et al. Noninvasive ventilation for COVID-19-associated acute hypoxaemic respiratory failure: experience from a single centre. *Br J Anaesth.* 2020;125(4):e368-e71.
12. Burns GP, Lane ND, Tedd HM, Deutsch E, Douglas F, West SD, et al. Improved survival following ward-based non-invasive pressure support for severe hypoxia in a cohort of frail patients with COVID-19: retrospective analysis from a UK teaching hospital. *BMJ Open Respir Res.* 2020;7(1).
13. Lalla U, Allwood BW, Louw EH, Nortje A, Parker A, Taljaard JJ, et al. The utility of high-flow nasal cannula oxygen therapy in the management of respiratory failure secondary to COVID-19 pneumonia. *S Afr Med J.* 2020;110(6):12941.

14. Wang T, Tang C, Chen R, Ruan H, Liang W, Guan W, et al. Clinical Features of Coronavirus Disease 2019 Patients With Mechanical Ventilation: A Nationwide Study in China. *Crit Care Med*. 2020;48(9):e809-e12.
15. Hong Y, Li J, Zhao G, Cheng R, Zhou P, Liu B. Clinical diagnosis and prognosis analysis of severe patients with novel coronavirus pneumonia. *Ningxia Med J*. 2020;42(4):337-9.
16. Li M, Kai C, Han H, Ma J, Gao J, Wu Y, et al. Effect of transnasal high-flow humidifying oxygen therapy in the treatment of new coronavirus pneumonia with acute respiratory failure. *Chinese Journal of Coal Industry Medicine*. 2020;23(2):221-4.
17. Oranger M, Gonzalez-Bermejo J, Dacosta-Noble P, Llontop C, Guerder A, Trosini-Desert V, et al. Continuous positive airway pressure to avoid intubation in SARS-CoV-2 pneumonia: a two-period retrospective case-control study. *European Respiratory Journal*. 2020;19:19.
18. Shang J, Du R, Lu Q, Wu J, Xu S, Ke Z, et al. The Treatment and Outcomes of Patients with COVID-19 in Hubei, China: A Multi-Centered, Retrospective, Observational Study. *SSRN*. 2020.
19. Tang J, Lu J, Liu X, Zheng J, Zhang X. Integrated nursing of traditional Chinese and western medicine for 7 elderly patients with severe new coronavirus pneumonia complicated with gastrointestinal dysfunction. *Chinese General Practice Nursing*. 2020;18(11):1339-41.
20. Zheng Y, Sun L-j, Xu M, Pan J, Zhang Y-t, Fang X-l, et al. Clinical characteristics of 34 COVID-19 patients admitted to intensive care unit in Hangzhou, China. *Journal of Zhejiang University-SCIENCE B (Biomedicine & Biotechnology)*. 2020;21(5):378-87.
21. Duca A, Memaj I, Zanardi F, Preti C, Alesi A, Della Bella L, et al. Severity of respiratory failure and outcome of patients needing a ventilatory support in the Emergency Department during Italian novel coronavirus SARS-CoV2 outbreak: Preliminary data on the role of Helmet CPAP and Non-Invasive Positive Pressure Ventilation. *EClinicalMedicine*. 2020;24:100419.
22. He Y, Lu Q, Guo L, Zhu J. Application of standardized respiratory support technology in severe patients with new coronavirus pneumonia. *Practical Hospital Clinical Journal*. 2020;17(2):59-61.
23. Hua DD, Zhu D, Gao Q, Feng J, Xie J, Wu Z, et al. Clinical application of nasal high-flow catheter wet oxygen therapy in the treatment of common type COVID-19. *Journal of Practical Medicine*. 2020:1-3.
24. Liao X, Chen H, Wang B, Li Z, Zhang Z, Li W, et al. Critical Care for Severe COVID-19: A Population-based Study from a Province with Low Case-fatality Rate in China. *medRxiv*. 2020.
25. Liu X, Xu Y, Hu M, Zhang X, Li W, Cao G, et al. Epidemiological characteristics and clinical characteristics of 47 cases of death of new coronavirus pneumonia in Huoshenshan Hospital. *People's Liberation Army Medical Journal*. 2020.
26. Liu X, Lu J, Zhang X, Jia Z, Tang J, Li C, et al. Nursing Care of 32 Patients with Severe Novel Coronavirus Pneumonia. *Journal of Nurse Training*. 2020:1-4.
27. Mo X, Peng P, Peng H, Li S, Xu L, Wu P, et al. Comparison of nasal high-flow humidified oxygen therapy and traditional oxygen therapy in patients with severe new coronavirus pneumonia. *Guangdong Medicine*. 2020:1-5.

28. Wang K, Zhao W, Li J, Shu W, Duan J. The experience of high-flow nasal cannula in hospitalized patients with 2019 novel coronavirus-infected pneumonia in two hospitals of Chongqing, China. *Annals of Intensive Care*. 2020;10(1):37.
29. Wang K, Zhang Z, Yu M, Tao Y, Xie M. 15-day mortality and associated risk factors for hospitalized patients with COVID-19 in Wuhan, China: an ambispective observational cohort study. *Intensive Care Med*. 2020.
30. Wu C, Chen X, Cai Y, Xia Ja, Zhou X, Xu S, et al. Risk Factors Associated With Acute Respiratory Distress Syndrome and Death in Patients With Coronavirus Disease 2019 Pneumonia in Wuhan, China. *JAMA internal medicine*. 2020.
